# Supplementary material
Source: publisher figshare collection journal article supplement (https://asha.figshare.com/articles/dataset/_/24060486)
Supplement: Supplementary file 1 [file 1]

**Supplemental Material S2.** Mean absolute error for the quantile regression model.

| Model       | Description of model                                                                                    | MAE of model | % reduction in error |
|-------------|---------------------------------------------------------------------------------------------------------|--------------|----------------------|
| Null model  | The null model is the model without any predictors                                                      | 3.357016     |                      |
| Full model  | This is the full model with all predictors included (whether they are statistically significant or not) | 3.083914626  | 8.14%                |
| Final model | Model with only significant predictors using stepwise regression                                        | 3.147459596  | 6.24%                |
